# Supplementary material for: CircRNA_Maml2 promotes the proliferation and migration of intestinal epithelial cells after severe burns by regulating the miR-93-3p/FZD7/Wnt/β-catenin pathway
Source: PubMed Central journal article supplement — Burns Trauma. 2022 Mar 7;10:tkac009. doi: 10.1093/burnst/tkac009 (PMC8900685; doi:10.1093/burnst/tkac009), 2022-03-07
Supplement: proof_of_polish_tkac009.pdf [file proof_of_polish_tkac009.pdf]

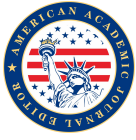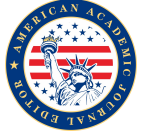

<https://www.mjeditor.com>

---

## EDITORIAL CERTIFICATE

This document certifies that the manuscript listed below was edited for grammar,punctuation,spelling,and overall style by one or more expert native English speaking editors with a PhD degree.

### Manuscript information

---

**ID: MJ2021112514941**

Editing date: 2021.11.25

Title :CircRNA\_Maml2 promotes the proliferation and migration of intestinal epithelial cells after severe burns by regulating the miR-93-3p/FZD7/Wnt/  $\beta$  -catenin pathway

Author :Wenwen Zhang, Yu Liao, Jiaqi Lou, Mengmeng Zhuang, Hao Yan, Qi Li, Yuequ Deng, Dandan Wen, Yong Sun

Language writing before editing: Very poor Poor Fair Good Very good Excellent

Recommendation after language editing: Submitting to target journal directly  
Submitting to target journal after minor revision  
Re-editing required after major revision  
Not suitable for publication

### Certificate by

---

*Sophiya. K*

Editor in Chief  
MJ Language Editing Services,Shenzhen,China

---

**Disclaimer:**Our service does not involve authenticity review or ethical review on the data(including images)presented in the manuscript.Neither the research content nor the author's intentions were altered in any way during the editing process.Documents receiving this certification should be English-ready for publication.The authors have the option to accept or reject our suggestions and changes in the edited document.However,we do not bear responsibility for revisions made to the document after our editing.If the manuscript is suspected of plagiarism,please contact the authors in time.

### MJ Language Editing Services

Diwang Building, No. 5002 Shennan Road, Luohu District, Shenzhen, China  
Tel:+086 0755 25100506
